# Supplementary material for: Role of combining anticoagulant and antiplatelet agents in COVID-19 treatment: a rapid review
Source: HighWire-hosted journal article supplement (doi:10.1136/openhrt-2021-001628), 2021-06-01
Supplement: openhrt-2021-001628supp001_data_supplement.pdf [file openhrt-2021-001628supp001_data_supplement.pdf]

**Table1:** Study characteristics of papers included in this review

| Author             | Study design         | Sample characteristics<br>(size, mean age, location) | Primary outcome                              | Medication given                    | Results                                                                                                    |
|--------------------|----------------------|------------------------------------------------------|----------------------------------------------|-------------------------------------|------------------------------------------------------------------------------------------------------------|
| Ayerbe et al.[1]   | Retrospective cohort | N=2,075<br>Age = 67.57±15.52<br>Spain                | Mortality (yes/no)                           | Heparin                             | Heparin reduced mortality rates in patients                                                                |
| Helms et al.[2]    | Prospective cohort   | N = 150<br>Age = 68 ± 7<br>France                    | Thrombotic event (yes/no)                    | Heparin (LMWH or UFH)               | Patients with ARDS secondary to COVID-19 developed thrombotic complications regardless of anticoagulation. |
| Nadkarni et al.[3] | Retrospective cohort | N = 4,389<br>Age = 65 ±12<br>USA                     | Mortality<br>Intubation<br>Bleeding (yes/no) | DOAC<br>Heparin (LMWH or UFH)       | Therapeutic and Prophylactic AC reduced mortality and risk of intubation compared to no AC.                |
| Bousquet et al.[4] | Prospective cohort   | N=108<br>Age = 78.4 ± 7.8<br>France                  | Mortality (yes/no)                           | Therapeutic AC (type not specified) | Therapeutic AC reduced one-month mortality compared to no AC                                               |
| Fauvel et al.[5]   | Retrospective cohort | N = 1,240<br>Age = 64 ± 17<br>France                 | Pulmonary embolism (yes/no)                  | Heparin (LMWH or UFH)               | Therapeutic AC and prophylactic AC were associated with reduced PE                                         |
| Tang et al.[6]     | Retrospective cohort | N = 449<br>Age = 65.1 ± 12.0<br>China                | Mortality (yes/no)                           | Heparin (LMWH or UFH)               | Therapeutic AC decreases 28-day mortality in severe cases                                                  |
| Author             | Study design         | Sample characteristics                               | Endpoint                                     | Intervention                        | Results                                                                                                    |

|                           |                                 | (size, controls,<br>location)          |                                                          |                                                                                                       |                                                                                                                           |
|---------------------------|---------------------------------|----------------------------------------|----------------------------------------------------------|-------------------------------------------------------------------------------------------------------|---------------------------------------------------------------------------------------------------------------------------|
| Gonzalez-Porras et al.[7] | Retrospective cohort            | N = 690<br>Age = 72.48 ±13.83<br>Spain | Mortality (yes/no)                                       | Heparin (LMWH)                                                                                        | High dose prophylactic LMWH reduced patient mortality by 2 folds compared to low dose and 6.2 folds compared to non-users |
| Li et al.[8]              | Retrospective cohort            | N = 1,125<br>Age = 58 ±15<br>China     | Thrombo-embolism<br>Bleeding (yes/no)                    | Heparin (LMWH or UFH)<br>NOAC<br>Warfarin                                                             | Anticoagulants reduced mortality and thromboembolic events                                                                |
| Russo et al.[9]           | Retrospective cohort            | N = 192<br>Age = 67.2 ±15.2<br>Italy   | Mortality (yes/no)                                       | Antiplatelet s(Aspirin or P2y12 inhibitor) and anticoagulant (NOAC or VKA)                            | Antiplatelet and antithrombotic therapies don't have a protective effect in severe COVID-19 patients suffering from ARDS. |
| Viecca et al.[10]         | Case control (proof of concept) | N = 5<br>Age = 61.8 ±15.4<br>Italy     | Hypoxemia and hypoxemia related outcomes (lower/high er) | Antiplatelets (Aspirin, tirofiban, clopidogrel)<br>Prophylactic Anticoagulant (Fondaparinux, heparin) | Enhanced gaseous exchange and reduced blood coagulation                                                                   |
| Chow et al. [11]          | Retrospective cohort            | N=412<br>Age=57<br>United States       | Mechanical ventilation, intensive care unit (ICU)        | Aspirin use defined within 24 hrs of admission to hospital                                            | Aspirin use was associated with a decreased risk of mechanical ventilation, ICU admission, and in-hospital mortality.     |

|                   |                         |                             |                                                        |                                                |                                                                                 |
|-------------------|-------------------------|-----------------------------|--------------------------------------------------------|------------------------------------------------|---------------------------------------------------------------------------------|
|                   |                         |                             | admission,<br>and in-<br>hospital<br>mortality         |                                                |                                                                                 |
| Pavoni et al.[12] | Retrospective<br>cohort | N=42<br>64.3 ±12.1<br>Italy | Venous<br>Thromboe<br>mbolism,<br>Bleeding<br>(yes/no) | Heparin<br>(LMWH)<br>Antiplatelet<br>(Aspirin) | Therapeutic dose heparin did<br>not reduce VTE, but there was<br>no major bleed |

Abbreviations: LMWH : Low molecular weight heparin; UFH: Unfractionated Heparin; DOAC: Direct oral anticoagulant, NOAC: Novel oral anticoagulant; VKA: Vitamin K antagonists; AC: anticoagulant; ARDS: acute respiratory distress syndrome.

- 1 Ayerbe L, Risco C, Ayis S. The association between treatment with heparin and survival in patients with Covid-19. *J Thromb Thrombolysis* 2020;:1–4.
- 2 Helms J, Tacquard C, Severac F, *et al.* High risk of thrombosis in patients with severe SARS-CoV-2 infection: a multicenter prospective cohort study. *Intensive Care Med* 2020;:1–10.
- 3 Nadkarni GN, Lala A, Bagiella E, *et al.* Anticoagulation, bleeding, mortality, and pathology in hospitalized patients with COVID-19. *J Am Coll Cardiol* 2020;**76**:1815–26.
- 4 Bousquet G, Falgarone G, Deutsch D, *et al.* ADL-dependency, D-Dimers, LDH and absence of anticoagulation are independently associated with one-month mortality in older inpatients with Covid-19. *Aging* 2020;**12**:11306.
- 5 Fauvel C, Weizman O, Trimaille A, *et al.* Pulmonary embolism in COVID-19 patients: a French multicentre cohort study. *Eur Heart J* 2020;**41**:3058–68.
- 6 Tang N, Bai H, Chen X, *et al.* Anticoagulant treatment is associated with decreased mortality in severe coronavirus disease 2019 patients with coagulopathy. *J Thromb Haemost JTH* 2020;**18**:1094–9. doi:10.1111/jth.14817
- 7 Gonzalez-Porras JR, Belhassen-Garcia M, Lopez-Bernus A, *et al.* Low Molecular Weight Heparin in Adults Inpatient COVID-19. 2020.

- 8 Li W, Xiong J, Guo Y, *et al.* Risk Factors for Systemic and Venous Thromboembolism, Mortality and Bleeding Risks in 1125 Patients with COVID-19: Relationship to Anticoagulation Status. *Preprints* 2020.
- 9 Russo V, Di Maio M, Attenu E, *et al.* Clinical impact of pre-admission antithrombotic therapy in hospitalized patients with COVID-19: a multicenter observational study. *Pharmacol Res* 2020;;104965.
- 10 Viecca M, Radovanovic D, Forleo GB, *et al.* Enhanced platelet inhibition treatment improves hypoxemia in patients with severe Covid-19 and hypercoagulability. A case control, proof of concept study. *Pharmacol Res* 2020;;104950.
- 11 Chow JH, Khanna AK, Kethireddy S, *et al.* Aspirin Use is Associated with Decreased Mechanical Ventilation, ICU Admission, and In-Hospital Mortality in Hospitalized Patients with COVID-19. *Anesth Analg* Published Online First: 21 October 2020. doi:10.1213/ANE.0000000000005292
- 12 Pavoni V, Ganesello L, Pazzi M, *et al.* Venous thromboembolism and bleeding in critically ill COVID-19 patients treated with higher than standard low molecular weight heparin doses and aspirin: A call to action. *Thromb Res* 2020;**196**:313–7. doi:10.1016/j.thromres.2020.09.013
